# Supplementary material
Source: Elsevier journal article supplement (https://www.sciencedirect.com/science/article/pii/S0210480617301778)
Supplement: mmc1 [file S0210480617301778:mmc1.pdf]

## Full list of articles included in the literature review

### Clinical studies based on online survey

- Erectile dysfunction <sup>1-16</sup>
- Premature ejaculation <sup>10,12-31</sup>
- Homosexuality <sup>32-40</sup>
- Hormones (including hypogonadism) <sup>41-44</sup>
- Fertility <sup>45-54</sup>

### Digital treatment

- Erectile dysfunction <sup>55-63</sup>
- Premature ejaculation <sup>55,57</sup>
- Sexual desire and satisfaction <sup>55</sup>
- Fertility <sup>64,65</sup>

### Quality/safety of digital healthcare environment

- Erectile dysfunction <sup>18,66-68</sup>
- Hormones and hypogonadism <sup>66</sup>
- Fertility <sup>69-76</sup>

### Digital activity

- Erectile dysfunction <sup>77</sup>
- Fertility <sup>78-81</sup>

### Patient empowerment

- Erectile dysfunction <sup>61,82-85</sup>
- Hormones and hypogonadism <sup>84</sup>
- Fertility <sup>86-105</sup>

### On-line drug selling

- Erectile dysfunction <sup>106-115</sup>
- Hormones <sup>116</sup>

## References

1. Corona G, Lee DM, Forti G, O'Connor DB, Maggi M, O'Neill TW, et al. Age-related changes in general and sexual health in middle-aged and older men: results from the European Male Ageing Study (EMAS). *J Sex Med.* 2010 Apr;7(4 Pt 1):1362–80.
2. Tsujimura A, Kiuchi H, Soda T, Takezawa K, Okuda H, Fukuhara S, et al. Sexual life of Japanese patients with erectile dysfunction taking phosphodiesterase type 5 inhibitors: An Internet survey using the Psychological and Interpersonal Relationship Scales-Short Form questionnaire. *Int J Urol.* 2014;21(8):821–5.
3. Shaeer O. The global online sexuality survey (GOSS): The USA of America in 2011 chapter V: Heterosexuality, polygamy and contraception among english-speaking males. *J Sex Med.* 2012 Feb;9(2):271.
4. Shaeer O, Shaeer K. The Global Online Sexuality Survey (GOSS): Male homosexuality among Arabic-speaking internet users in the Middle East-2010. *J Sex Med.* 2014 Aug;11(10):2414–20.
5. Kimura M, Shimura S, Tai T, Kobayashi H, Baba S, Kano M, et al. A web-based survey of erection hardness score and its relationship to aging, sexual behavior, confidence, and risk factors in Japan. *Sex Med.* 2013 Dec;1(2):76–86.
6. McCabe M, Matic H. Severity of ED: Relationship to treatment-seeking and satisfaction with treatment using PDE5 inhibitors. *J Sex Med.* 2007 Jan;4(1):145–51.
7. Cameron A, Rosen RC, Swindle RW. Sexual and relationship characteristics among an internet-based sample of U.S. men with and without erectile dysfunction. *J Sex Marital Ther.* 2005;31(3):229–42.
8. Oksuz E, Malhan S. The prevalence of male sexual dysfunction and potential risk factors in Turkish men: a Web-based survey. *Int J Impot Res.* 2005;17(6):539–45.
9. Shaeer O. The global online sexuality survey (GOSS): The United States of America in 2011 chapter iii- premature ejaculation among english-speaking male internet users. *J Sex Med.* 2013 Dec;10(7):1882–8.

10. Choi WS, Song SH, Son H. Epidemiological Study of Complementary and Alternative Medicine (CAM) Use for the Improvement of Sexual Function in Young Korean Men: The Korean Internet Sexuality Survey (KISS), Part II. *J Sex Med.* 2012 Sep;9(9):2238–47.
11. Schostak M, Baumunk D, Jagota A, Klopf C, Winter A, Sch??fers S, et al. Time trends in prostate cancer surgery: Data from an Internet-based multicentre database. *BJU Int.* 2012 Feb;109(3):355–9.
12. Breyer BN, Smith JF, Eisenberg ML, Ando KA, Rowen TS, Shindel AW. The Impact of Sexual Orientation on Sexuality and Sexual Practices in North American Medical Students. *J Sex Med.* 2010 Jul;7(7):2391–400.
13. Shindel AW, Ando KA, Nelson CJ, Breyer BN, Lue TF, Smith JF. Medical student sexuality: how sexual experience and sexuality training impact U.S. and Canadian medical students' comfort in dealing with patients' sexuality in clinical practice. *Acad Med.* 2010 Aug;85(8):1321–30.
14. Smith JF, Breyer BN, Shindel AW. Predictors of Sexual Bother in a Population of Male North American Medical Students. *J Sex Med.* 2011 Dec;8(12):3363–9.
15. Coyne KS, Sexton CCC, Thompson C, Kopp ZSZS, Milsom I, Kaplan SASA, et al. The Impact of OAB on Sexual Health in Men and Women: Results from EpiLUTS. 2011 Jun;8(6).
16. Bernstein AN, Levinson AW, Hobbs AR, Lavery HJ, Samadi DB. Validation of online administration of the sexual health inventory for men. *J Urol.* 2013 Apr;189(4):1456–61.
17. Rowland DL, Neal CJ. Understanding men's attributions of why they ejaculate before desired: An internet study. *J Sex Med.* 2014 Oct;11(10):2554–61.
18. Read J, Mati E. Erectile Dysfunction and the Internet:\nDrug Company Manipulation of Public\nand Professional Opinion. *J Sex Marital Ther.* 2013;39(6):541–59.
19. Park HJ, Park JK, Park K, Lee SW, Kim S-W, Yang DY, et al. Prevalence of premature ejaculation in young and middle-aged men in Korea: a multicenter internet-based survey from the Korean Andrological Society. *Asian J Androl.* 2010 Nov;12(6):880–9.
20. Son H, Song SH, Kim SW, Paick J-S. Self-reported premature ejaculation prevalence and characteristics in

- Korean young males: community-based data from an internet survey. *J Androl.* 2010;31(6):540–6.
21. Rowland DL, Mikolajczyk LC, Pinkston DM, Reed HM, Lo DM. Attribution Patterns in Men Who Ejaculate Before They Desire: An Internet Survey. *J Sex Marital Ther.* 2016 Jul 3;42(5):462–73.
  22. Rowland DL, Kolba TN. Understanding the Effects of Establishing Various Cutoff Criteria in the Definition of Men with Premature Ejaculation. *J Sex Med.* 2015 May;12(5):1175–83.
  23. Saitz TR, Serefoglu EC. The Global Online Sexuality Survey (GOSS): The United States of America in 2011 chapterIII-premature ejaculation among english-speaking male internet users. Vol. 11, *Journal of Sexual Medicine.* 2014. p. 1349–50.
  24. Song SH, Choi WS, Son H, Paick JS. Validity of the premature ejaculation diagnostic tool in four subgroups of premature ejaculation syndrome: Data from the korean internet sexuality survey-Part 1. *Sex Health.* 2014 Mar;11(1):73–80.
  25. Vakalopoulos I, Dimitriadis G, Varnava C, Herodotou Y, Gkotsos G, Radopoulos D. Prevalence of ejaculatory disorders in urban men - results of a random-sample survey. *Andrologia.* 2011 Oct;43(5):327–33.
  26. Son H, Song SH, Lee JY, Paick JS. Relationship between premature ejaculation and depression in Korean males. *J Sex Med.* 2011 Jul;8(7):2062–70.
  27. Porst H, Montorsi F, Rosen RC, Gaynor L, Grupe S, Alexander J. The Premature Ejaculation Prevalence and Attitudes (PEPA) Survey: Prevalence, Comorbidities, and Professional Help-Seeking. *Eur Urol.* 2007;51(3):816–24.
  28. Rowland D, Perelman M, Althof S, Barada J, McCullough A, Bull S, et al. Self-reported premature ejaculation and aspects of sexual functioning and satisfaction. *J Sex Med.* 2004 Sep;1(2):225–32.
  29. Shaer O, Shaer K, Feldman HA, Goldstein I, Hatzichristou DG, Waldinger MD, et al. The Global Online Sexuality Survey (GOSS): ejaculatory function, penile anatomy, and contraceptive usage among Arabic-speaking Internet users in the Middle East. *J Sex Med.* 2012 Feb;9(2):425–33.

30. Waldinger MD, Schweitzer DH. The use of old and recent DSM definitions of premature ejaculation in observational studies: A contribution to the present debate for a new classification of PE in the DSM-V. Vol. 5, *Journal of Sexual Medicine*. 2008. p. 1079–87.
31. Limoncin E, Tomassetti M, Gravina GL, Ciocca G, Carosa E, Di Sante S, et al. Premature ejaculation results in female sexual distress: Standardization and validation of a new diagnostic tool for sexual distress. *J Urol*. 2013 May;189(5):1830–5.
32. Kramer SC, Schmidt AJ, Berg RC, Furegato M, Hospers H, Folch C, et al. Factors associated with unprotected anal sex with multiple non-steady partners in the past 12 months: results from the European Men-Who-Have-Sex-With-Men Internet Survey (EMIS 2010). *BMC Public Health*. 2016;16:47.
33. Lim SH, Cheung DH, Guadamuz TE, Wei C, Koe S, Altice FL. Latent class analysis of substance use among men who have sex with men in Malaysia: Findings from the Asian Internet MSM Sex Survey. *Drug Alcohol Depend*. 2015 Jun 1;151:31–7.
34. Mitchell JW. Relationship Characteristics Differ Based on Use of Substances with Sex among an Urban Internet Sample of HIV-Discordant and HIV-Positive Male Couples. *J Urban Heal*. 2015 Feb;92(1):136–50.
35. Yu G, Wall MM, Chiasson MA, Hirshfield S. Complex Drug Use Patterns and Associated HIV Transmission Risk Behaviors in an Internet Sample of U.S. Men Who Have Sex with Men. *Arch Sex Behav*. 2014 Feb;44(2):421–8.
36. Vansintejan J, Janssen J, Van De Vijver E, Vandevoorde J, Devroey D. The gay men sex studies: Prevalence of sexual dysfunctions in belgian HIV+ gay men. *HIV/AIDS - Res Palliat Care*. 2013;5:89–96.
37. Vansintejan J, Vandevoorde J, Devroey D. The GAY MEn Sex Studies: Design of an online registration of sexual behaviour of men having sex with men and preliminary results (GAMESSS-study). *Cent Eur J Public Health*. 2013 Mar;21(1):48–53.
38. Tsui HY, Lau JTF, Feng T, Hong F, Cai Y, Zhou H, et al. Sexual dysfunction and unprotected anal intercourse among men who have sex with men in two Chinese cities. *J Sex Marital Ther*. 2014;40(2):139–48.

39. Shindel AW, Horberg MA, Smith JF, Breyer BN. Sexual Dysfunction, HIV, and AIDS in Men Who Have Sex with Men. *AIDS Patient Care STDS*. 2011 Jun;25(6):341–9.
40. Rhodes SD, Hergenrather KC, Yee LJ, Knipper E, Wilkin AM, Omli MR. Characteristics of a sample of men who have sex with men, recruited from gay bars and Internet chat rooms, who report methamphetamine use. *AIDS Patient Care STDS*. 2007 Aug;21(8):575–83.
41. Rosen RC, Seftel AD, Ruff DD, Muram D. A Pilot Study Using a Web Survey to Identify Characteristics That Influence Hypogonadal Men to Initiate Testosterone Replacement Therapy. *Am J Mens Health*. 2016 Jan 27;
42. Dwyer AA, Quinton R, Morin D, Pitteloud N. Identifying the unmet health needs of patients with congenital hypogonadotropic hypogonadism using a web-based needs assessment: implications for online interventions and peer-to-peer support. *Orphanet J Rare Dis*. 2014;9:83.
43. Pirola I, Cappelli C, Delbarba A, Scalvini T, Agosti B, Assanelli D, et al. Anabolic steroids purchased on the Internet as a cause of prolonged hypogonadotropic hypogonadism. *Fertil Steril*. 2010 Nov;94(6):2331.e1-3.
44. Trinick TR, Feneley MR, Welford H, Carruthers M. International web survey shows high prevalence of symptomatic testosterone deficiency in men. *Aging Male*. 2011 Mar;14(1):10–5.
45. Hsiao F-Y, Huang WJ, Chen K-K. The exposure of urologists and the treatment for male factor infertility on the Web sites of ART centers in Taiwan. *J Androl*. 2011;32(2):155–8.
46. Tschudin S, Bunting L, Abraham J, Gallop-Evans E, Fiander A, Boivin J. Correlates of fertility issues in an internet survey of cancer survivors. *J Psychosom Obstet Gynaecol*. 2010 Sep;31(3):150–7.
47. Himmel W, Dahl E, Michelmann HW. Preconception sex selection: A survey of visitors to an internet-based health forum. *Reprod Biomed Online*. 2008 Mar;16(SUPPL. 1):18–26.
48. Haagen EC, Tuil W, Hendriks J, De Bruijn RPJ, Braat DDM, Kremer JAM. Current Internet use and preferences of IVF and ICSI patients. *Hum Reprod*. 2003 Oct;18(10):2073–8.

49. Meacham RB, Niederberger CS. Use of a moderated international Internet information exchange in the study of male reproduction. Vol. 48, *Urology*. 1996. p. 3–6.
50. Christianson MS, Shoham G, Tobler KJ, Zhao Y, Cordeiro CN, Leong M, et al. Measurement of antral follicle count in patients undergoing in vitro fertilization treatment: results of a worldwide web-based survey. *J Assist Reprod Genet*. 2015 Oct;32(10):1435–40.
51. Brezina PR, Mensah V, Balen A, Leong M, Weissman A, Zhao Y, et al. Fertility management in the PCOS population: results of a web-based survey at IVF-worldwide.com. *J Assist Reprod Genet*. 2013 Sep;30(9):1169–74.
52. Kahlor L, Mackert M. Perceptions of infertility information and support sources among female patients who access the Internet. *Fertil Steril*. 2009 Jan;91(1):83–90.
53. Partridge AH, Gelber S, Peppercorn J, Sampson E, Knudsen K, Laufer M, et al. Web-based survey of fertility issues in young women with breast cancer. *J Clin Oncol*. 2004 Oct 15;22(20):4174–83.
54. Jansen NA, Saint Onge JM. An internet forum analysis of stigma power perceptions among women seeking fertility treatment in the United States. *Soc Sci Med*. 2015 Dec;147:184–9.
55. Blanken I, Leusink P, van Diest S, Gijs L, van Lankveld JJDM. Outcome predictors of internet-based brief sex therapy for sexual dysfunctions in heterosexual men. *J Sex Marital Ther*. 2014;41(July):37–41.
56. Schover LR, Canada AL, Yuan Y, Sui D, Neese L, Jenkins R, et al. A randomized trial of internet-based versus traditional sexual counseling for couples after localized prostate cancer treatment. *Cancer*. 2012 Jan 15;118(2):500–9.
57. Van Diest SL, Van Lankveld JJDM, Leusink PM, Slob AK, Gijs L. Sex therapy through the internet for men with sexual dysfunctions: a pilot study. *J Sex Marital Ther*. 2007;33(2):115–33.
58. Andersson E, Walén C, Hallberg J, Paxling B, Dahlin M, Almlöv J, et al. A randomized controlled trial of guided Internet-delivered cognitive behavioral therapy for erectile dysfunction. *J Sex Med*. 2011 Oct;8(10):2800–9.

59. van Lankveld JJDM, Leusink P, van Diest S, Gijs L, Slob AK. Internet-based brief sex therapy for heterosexual men with sexual dysfunctions: a randomized controlled pilot trial. *J Sex Med.* 2009 Aug;6(8):2224–36.
60. McCabe MP, Price E, Piterman L, Lording D. Evaluation of an internet-based psychological intervention for the treatment of erectile dysfunction. *Int J Impot Res.* 2008;20(3):324–30.
61. Leusink PM, Aarts E. Treating erectile dysfunction through electronic consultation: a pilot study. *J Sex Marital Ther.* 2006;32(5):401–7.
62. McCabe M, Price E. Internet-based psychological and oral medical treatment compared to psychological treatment alone for ED. *J Sex Med.* 2008 Oct;5(10):2338–46.
63. Gabarron E, Serrano JA, Wynn R, Armayones M. Avatars using computer/smartphone mediated communication and social networking in prevention of sexually transmitted diseases among North-Norwegian youngsters. *BMC Med Inform Decis Mak.* 2012;12:120.
64. Marcus D, Marcus H, Marcus N, Appleton T, Marcus S. Infertility counselling--an internet-based survey. *Hum Fertil (Camb).* 2007 Jun;10(2):111–6.
65. Andersson G, Ljótsson B, Weise C. Internet-delivered treatment to promote health. *Curr Opin Psychiatry.* 2011 Mar;24(2):168–72.
66. Amber KT, Dhiman G, Goodman KW. Conflict of interest in online point-of-care clinical support websites. *J Med Ethics.* 2014 Aug;40(8):578–80.
67. Waack KE, Ernst ME, Graber MA. Informational content of official pharmaceutical industry web sites about treatments for erectile dysfunction. Vol. 38, *Annals of Pharmacotherapy.* 2004. p. 2029–34.
68. Mulhall JP, Rojaz-Cruz C, Müller A. An analysis of sexual health information on radical prostatectomy websites. *BJU Int.* 2010 Jan;105(1):68–72.
69. Marriott J V, Stec P, El-Toukhy T, Khalaf Y, Braude P, Coomarasamy A. Infertility information on the World Wide Web: a cross-sectional survey of quality of infertility information on the internet in the UK. *Hum Reprod.* 2008 Jul;23(7):1520–5.

70. Merrick H, Wright E, Pacey AA, Eiser C. Finding out about sperm banking: what information is available online for men diagnosed with cancer? *Hum Fertil (Camb)*. 2012 Sep;15(3):121–8.
71. Okamura K, Bernstein J, Fidler AT. Assessing the quality of infertility resources on the world wide web: Tools to guide clients through the maze of fact and fiction. *J Midwifery Women's Heal*. 2002;47(4):264–8.
72. Jain T, Barbieri RL. Website quality assessment: Mistaking apples for oranges. Vol. 83, *Fertility and Sterility*. 2005. p. 545–7.
73. Jona K, Gerber A. MyOncofertility.org: a web-based patient education resource supporting decision making under severe emotional and cognitive overload. *Cancer Treat Res*. 2010;156:345–61.
74. Adashi EY, Wyden R. Public reporting of clinical outcomes of assisted reproductive technology programs: implications for other medical and surgical procedures. *JAMA*. 2011 Sep 14;306(10):1135–6.
75. Hirshfeld-Cytron J. Warning: google can be hazardous to your health: fertility preservation is an important part of cancer care. *Cancer Treat Res*. 2010;156:467–8.
76. Zahalsky M, Wilson SR, Di Blasio CJ, Lam SK, Nagler HM. Male infertility on the internet: An analysis of web-based resources. Vol. 95, *BJU International*. 2005. p. 481–4.
77. Davis NF, Smyth LG, Flood HD. Detecting internet activity for erectile dysfunction using search engine query data in the Republic of Ireland. *BJU Int*. 2012 Dec;110(11 C):E939-42.
78. Speier AR. Brokers, consumers and the internet: how North American consumers navigate their infertility journeys. *Reprod Biomed Online*. 2011 Nov;23(5):592–9.
79. Huang JY., Al-Fozan H, Tan S., Tulandi T. Internet use by patients seeking infertility treatment. *Int J Gynecol Obstet*. 2003 Oct;83(1):75–6.
80. Epstein YM, Rosenberg HS. Assessing infertility information on the Internet: Challenges and possible solutions. Vol. 83, *Fertility and Sterility*. 2005. p. 553–5.

81. Epstein YM, Rosenberg HS, Grant TV, Hemenway Ba N. Use of the internet as the only outlet for talking about infertility. *Fertil Steril*. 2002 Sep;78(3):507–14.
82. Diefenbach MA, Mohamed NE, Butz BP, Bar-Chama N, Stock R, Cesaretti J, et al. Acceptability and preliminary feasibility of an Internet/CD-ROM-based education and decision program for early-stage prostate cancer patients: Randomized pilot study. *J Med Internet Res*. 2012;14(1):e6.
83. Symonds T, Coyne KS, Margolis MK, Schnetzler G. The ability of the general male public to assess their suitability to take 50-mg sildenafil: An assessment of the comprehension of patient information materials via internet survey. *J Sex Med*. 2011 Jul;8(7):2038–47.
84. Hart A, Henwood F, Wyatt S. The role of the internet in patient-practitioner relationships: Findings from a qualitative research study. *J Med Internet Res*. 2004 Sep 30;6(3):e36.
85. Kerfoot BP. Interactive Spaced Education Versus Web Based Modules for Teaching Urology to Medical Students: A Randomized Controlled Trial. *J Urol*. 2008 Jun;179(6):2351–7.
86. Aarts JWM, van den Haak P, Nelen WLDM, Tuil WS, Faber MJ, Kremer JAM. Patient-focused internet interventions in reproductive medicine: A scoping review. Vol. 18, *Human Reproduction Update*. 2012. p. 211–27.
87. Aarts JWM, van Oers AM, Faber MJ, Cohlen BJ, Nelen WLDM, Kremer JAM, et al. Communication at an online infertility expert forum: Provider responses to patients' emotional and informational cues. Vol. 36, *Journal of Psychosomatic Obstetrics & Gynecology*. 2015. p. 66–74.
88. Aarts JWM, Faber MJ, Cohlen BJ, Van Oers A, Nelen WLDM, Kremer JAM. Lessons learned from the implementation of an online infertility community into an IVF clinic's daily practice. *Hum Fertil*. 2015;18(4):238–47.
89. Aarts JWM, Faber MJ, Den Boogert AG, Cohlen BJ, Van Der Linden PJQ, Kremer JAM, et al. Barriers and facilitators for the implementation of an online clinical health community in addition to usual fertility care: A cross-sectional study. *J Med Internet Res*. 2013;15(8):e163.

90. Londra LC, Tobler KJ, Omurtag KR, Donohue MB. Spanish language content on reproductive endocrinology and infertility practice websites. *Fertil Steril*. 2014 Nov;102(5):1371–6.
91. Omurtag K, Turek P. Incorporating social media into practice: a blueprint for reproductive health providers. *Clin Obstet Gynecol*. 2013 Sep;56(3):463–70.
92. Takabayashi C, Shimada K. Do Infertile Women and Government Staff Differ in the Evaluation of Infertility-related Web Sites? *Public Health Nurs*. 2011;28(5):411–20.
93. Isupova OG. Support through patient internet-communities: Lived experience of Russian in vitro fertilization patients. *Int J Qual Stud Health Well-being*. 2011;6(3).
94. Hinton L, Kurinczuk JJ, Ziebland S. Infertility; isolation and the Internet: a qualitative interview study. *Patient Educ Couns*. 2010 Dec;81(3):436–41.
95. Meneses K, McNeess P, Azuero A, Jukkala A. Development of the Fertility and Cancer Project: an Internet approach to help young cancer survivors. *Oncol Nurs Forum*. 2010 Mar;37(2):191–7.
96. Sexton MB, Byrd MR, O'Donohue WT, Jacobs NN. Web-based treatment for infertility-related psychological distress. *Arch Womens Ment Health*. 2010 Aug;13(4):347–58.
97. Bunting L, Boivin J. Decision-making about seeking medical advice in an internet sample of women trying to get pregnant. *Hum Reprod*. 2007 Jun;22(6):1662–8.
98. Tuil WS, Verhaak CM, Braat DD, de Vries RPF, Kremer JAM. Empowering patients undergoing in vitro fertilization by providing Internet access to medical data. *Fertil Steril*. 2007 Aug;88(2):361–8.
99. Himmel W, Meyer J, Kochen MM, Michelmann HW. Information needs and visitors' experience of an internet expert forum on infertility. Vol. 7, *Journal of Medical Internet Research*. 2005. p. e20.
100. Malik SH, Coulson NS. Computer-mediated infertility support groups: an exploratory study of online experiences. *Patient Educ Couns*. 2008 Oct;73(1):105–13.
101. Cousineau TM, Green TC, Corsini E, Seibring A, Showstack MT, Applegarth L, et al. Online

- psychoeducational support for infertile women: a randomized controlled trial. *Hum Reprod*. 2008 Mar;23(3):554–66.
102. Malik S, Coulson NS. "They all supported me but I felt like I suddenly didn't belong anymore': an exploration of perceived disadvantages to online support seeking. *J Psychosom Obstet Gynaecol*. 2010 Sep;31(3):140–9.
103. Haemmerli K, Znoj H, Berger T. Internet-based support for infertile patients: a randomized controlled study. *J Behav Med*. 2010 Apr;33(2):135–46.
104. Baazeem M, Abenhaim H. Google and Women's Health-Related Issues: What Does the Search Engine Data Reveal? *Online J Public Health Inform*. 2014;6(2):e187.
105. Jenkins JM. ReProMED on the Internet today and tomorrow. *Hum Fertil (Camb)*. 2002 Feb;5(1 Suppl):S66-71.
106. Solomon H, Man J, Gill J, Jackson G. Viagra on the internet: Unsafe sexual practice. *Int J Clin Pract*. 2002 Jun;56(5):403–4.
107. Jones MJ. Internet-based prescription of sildenafil: A 2104-patient series. *J Med Internet Res*. 2001;3(1):21–38.
108. Kahan SE, Seftel AD, Resnick MI, Casey M, Beh HG, Reiser SJ, et al. Sildenafil and the internet. *J Urol*. 2000 Mar;163(3):919–23.
109. Armstrong K, Schwartz JS, Asch DA. Direct sale of sildenafil (Viagra) to consumers over the Internet. *N Engl J Med*. 1999 Oct 28;341(18):1389–92.
110. Sacchetti P, Zvara P, Plante MK. The internet and patient education - Resources and their reliability: Focus on a select urologic topic. *Urology*. 1999 Jun;53(6):1117–20.
111. The Lancet. Viagra's licence and the internet. Editorial. *Lancet (London, England)*. 1998 Sep 5;352(9130):751.

112. Gallagher CT, Chapman LE. Classification, location and legitimacy of web-based suppliers of Viagra to the UK. *Int J Pharm Pract*. 2010 Dec;18(6):341–5.
113. Munger MA, Stoddard GJ, Wenner AR, Bachman JW, Jurige JH, Poe L, et al. Safety of prescribing PDE-5 inhibitors via e-medicine vs traditional medicine. *Mayo Clin Proc*. 2008 Aug;83(8):890–6.
114. De Orsi D, Pellegrini M, Marchei E, Nebuloni P, Gallinella B, Scaravelli G, et al. High performance liquid chromatography-diode array and electrospray-mass spectrometry analysis of vardenafil, sildenafil, tadalafil, testosterone and local anesthetics in cosmetic creams sold on the Internet web sites. *J Pharm Biomed Anal*. 2009 Oct 15;50(3):362–9.
115. Thurairaja R, Barrass B, Persad R. Internet websites selling herbal treatments for erectile dysfunction. *Int J Impot Res*. 2005;17(2):196–200.
116. Cordaro FG, Lombardo S, Cosentino M. Selling androgenic anabolic steroids by the pound: identification and analysis of popular websites on the Internet. *Scand J Med Sci Sport*. 2011 Dec;21(6):e247-59.
